# Supplementary material for: The miRNA–mRNA regulatory networks of the response to NaHCO3 stress in industrial hemp (Cannabis sativa L.)
Source: BMC Plant Biol. 2023 Oct 24;23:509. doi: 10.1186/s12870-023-04463-w (PMC10594861; doi:10.1186/s12870-023-04463-w)
Supplement: Supplementary file 1 — Additional file 1: Table A2. List of primer sequences used in this study. [file 12870_2023_4463_MOESM1_ESM.xlsx]

## Sheet: Table A5
Table A5. The KEGG pathway enrichment analysis of upregulated DEGs in group of Huoma No.1 under NaHCO3 stress.
#KEGG_n	91	KEGG_N	4964
#Pathway	ko_ID	Selected_gene_in_Pathway	AllGene_in_Pathway	Selected_gene_in_All_pathways	AllGene_in_All_pathways	Gene_id	KEGG_Orthology
Endocytosis	ko04144	12	191	91	4964	Cannabis_sativa_newGene_12605;Cannabis_sativa_newGene_20900;Cannabis_sativa_newGene_2124;Cannabis_sativa_newGene_22098;Cannabis_sativa_newGene_22526;Cannabis_sativa_newGene_5763;Cannabis_sativa_newGene_8925;Cannabis_sativa_newGene_9452;FN00775.1.g;FN03857.1.g;FN16370.1.g;FN20141.1.g	K00889+K12486+K07937+K07897+K00889+K01528+K12191+K12486+K01115+K03283+K10396+K01115
Carbon metabolism	ko01200	11	230	91	4964	Cannabis_sativa_newGene_10791;Cannabis_sativa_newGene_1124;Cannabis_sativa_newGene_140;Cannabis_sativa_newGene_17885;Cannabis_sativa_newGene_22406;Cannabis_sativa_newGene_22624;FN01889.1.g;FN07571.1.g;FN07605.1.g;FN14401.1.g;FN20117.1.g	K00850+K13034+K00232+K00232+K00863+K00863+K00036+K05605+K00626+K01738+K14455
Peroxisome	ko04146	6	80	91	4964	Cannabis_sativa_newGene_140;Cannabis_sativa_newGene_17885;Cannabis_sativa_newGene_22536;Cannabis_sativa_newGene_4604;Cannabis_sativa_newGene_77;FN12719.1.g	K00232+K00232+K13356+K01897+K13356+K13346
Biosynthesis of amino acids	ko01230	6	188	91	4964	Cannabis_sativa_newGene_10791;Cannabis_sativa_newGene_1124;Cannabis_sativa_newGene_12050;Cannabis_sativa_newGene_9443;FN14401.1.g;FN20117.1.g	K00850+K13034+K00145+K00891+K01738+K14455
RNA degradation	ko03018	5	106	91	4964	Cannabis_sativa_newGene_10791;Cannabis_sativa_newGene_13662;FN01608.1.g;FN01624.1.g;FN30848.1.g	K00850+K12608+K00962+K12581+K14442
Fatty acid metabolism	ko01212	5	64	91	4964	Cannabis_sativa_newGene_140;Cannabis_sativa_newGene_17885;Cannabis_sativa_newGene_4604;FN07605.1.g;FN34002.1.g	K00232+K00232+K01897+K00626+K10781
Pentose and glucuronate interconversions	ko00040	4	134	91	4964	Cannabis_sativa_newGene_10783;Cannabis_sativa_newGene_8663;FN04743.1.g;FN37440.1.g	K01184+K12447+K01051+K01184
Sesquiterpenoid and triterpenoid biosynthesis	ko00909	4	44	91	4964	Cannabis_sativa_newGene_10016;Cannabis_sativa_newGene_14197;Cannabis_sativa_newGene_18806;Cannabis_sativa_newGene_5631	K20659+K15813+K15813+K15813
Cysteine and methionine metabolism	ko00270	4	102	91	4964	Cannabis_sativa_newGene_1124;Cannabis_sativa_newGene_2449;FN14401.1.g;FN20117.1.g	K13034+K17398+K01738+K14455
Spliceosome	ko03040	4	179	91	4964	Cannabis_sativa_newGene_6330;FN03857.1.g;FN08825.1.g;FN25023.1.g	K12837+K03283+K12842+K12816
Fructose and mannose metabolism	ko00051	4	59	91	4964	Cannabis_sativa_newGene_10791;Cannabis_sativa_newGene_21801;Cannabis_sativa_newGene_22406;Cannabis_sativa_newGene_22624	K00850+K00895+K00863+K00863
ABC transporters	ko02010	4	105	91	4964	Cannabis_sativa_newGene_4127;Cannabis_sativa_newGene_5213;Cannabis_sativa_newGene_5442;FN09934.1.g	K08712+K05666+K08712+K05681
Fatty acid degradation	ko00071	4	55	91	4964	Cannabis_sativa_newGene_140;Cannabis_sativa_newGene_17885;Cannabis_sativa_newGene_4604;FN07605.1.g	K00232+K00232+K01897+K00626
Amino sugar and nucleotide sugar metabolism	ko00520	4	152	91	4964	Cannabis_sativa_newGene_12477;Cannabis_sativa_newGene_19849;Cannabis_sativa_newGene_20716;Cannabis_sativa_newGene_8663	K12448+K01183+K01183+K12447
Propanoate metabolism	ko00640	4	36	91	4964	Cannabis_sativa_newGene_140;Cannabis_sativa_newGene_17885;FN07571.1.g;FN07605.1.g	K00232+K00232+K05605+K00626
Sulfur metabolism	ko00920	3	30	91	4964	Cannabis_sativa_newGene_1124;Cannabis_sativa_newGene_21277;FN14401.1.g	K13034+K00392+K01738
Cyanoamino acid metabolism	ko00460	3	63	91	4964	Cannabis_sativa_newGene_1124;Cannabis_sativa_newGene_3765;FN26076.1.g	K13034+K08248+K08248
Glycerolipid metabolism	ko00561	3	74	91	4964	Cannabis_sativa_newGene_22406;Cannabis_sativa_newGene_22624;FN05191.1.g	K00863+K00863+K00679
Ascorbate and aldarate metabolism	ko00053	3	72	91	4964	Cannabis_sativa_newGene_5163;Cannabis_sativa_newGene_7050;Cannabis_sativa_newGene_8663	K00434+K00423+K12447
beta-Alanine metabolism	ko00410	3	48	91	4964	Cannabis_sativa_newGene_140;Cannabis_sativa_newGene_17885;FN07571.1.g	K00232+K00232+K05605

## Sheet: Table A6
Table A6. The KEGG pathway enrichment analysis of upregulated DEGs in group of Jindao-15 under NaHCO3 stress.
#KEGG_n	286	KEGG_N	4964
#Pathway	ko_ID	Selected_gene_in_Pathway	AllGene_in_Pathway	Selected_gene_in_All_pathways	AllGene_in_All_pathways	Gene_id	KEGG_Orthology
Plant hormone signal transduction	ko04075	19	254	286	4964	Cannabis_sativa_newGene_10794;Cannabis_sativa_newGene_11233;Cannabis_sativa_newGene_11833;Cannabis_sativa_newGene_12256;Cannabis_sativa_newGene_21693;Cannabis_sativa_newGene_2614;Cannabis_sativa_newGene_4258;Cannabis_sativa_newGene_6196;Cannabis_sativa_newGene_6373;Cannabis_sativa_newGene_8955;FN00011.1.g;FN02296.1.g;FN08871.1.g;FN08918.1.g;FN14845.1.g;FN22590.1.g;FN24008.1.g;FN25713.1.g;FN30298.…	K14486+K14497+K16189+K14494+K14486+K14432+K14431+K14489+K13415+K14500+K14485+K13422+K13415+K13449+K14431+K13416+K13416+K13416+K14515
Starch and sucrose metabolism	ko00500	15	203	286	4964	Cannabis_sativa_newGene_11486;Cannabis_sativa_newGene_1208;Cannabis_sativa_newGene_13905;Cannabis_sativa_newGene_14907;Cannabis_sativa_newGene_18498;Cannabis_sativa_newGene_18725;Cannabis_sativa_newGene_18921;Cannabis_sativa_newGene_20866;Cannabis_sativa_newGene_21840;Cannabis_sativa_newGene_23520;Cannabis_sativa_newGene_4509;Cannabis_sativa_newGene_7096;Cannabis_sativa_newGene_8554;Cannabis_sati…	K01087+K01087+K16055+K19891+K01188+K01193+K01188+K00695+K01087+K00695+K01177+K01810+K01193+K01188+K19891
Protein processing in endoplasmic reticulum	ko04141	15	184	286	4964	Cannabis_sativa_newGene_12928;Cannabis_sativa_newGene_1525;Cannabis_sativa_newGene_18137;Cannabis_sativa_newGene_21560;Cannabis_sativa_newGene_23490;Cannabis_sativa_newGene_4174;Cannabis_sativa_newGene_48;Cannabis_sativa_newGene_5802;Cannabis_sativa_newGene_6247;FN01681.1.g;FN07489.1.g;FN12827.1.g;FN19994.1.g;FN30530.1.g;FN34501.1.g	K13993+K03283+K09562+K09487+K09518+K09562+K09487+K03283+K03283+K13993+K13993+K04079+K10661+K03283+K13993
MAPK signaling pathway - plant	ko04016	13	198	286	4964	Cannabis_sativa_newGene_11233;Cannabis_sativa_newGene_13099;Cannabis_sativa_newGene_13211;Cannabis_sativa_newGene_14638;Cannabis_sativa_newGene_7475;FN02296.1.g;FN08918.1.g;FN21632.1.g;FN22590.1.g;FN24008.1.g;FN25713.1.g;FN30298.1.g;FN36445.1.g	K14497+K02183+K16224+K20718+K16224+K13422+K13449+K13420+K13416+K13416+K13416+K14515+K20600
Phenylpropanoid biosynthesis	ko00940	12	180	286	4964	Cannabis_sativa_newGene_1073;Cannabis_sativa_newGene_1139;Cannabis_sativa_newGene_12769;Cannabis_sativa_newGene_12958;Cannabis_sativa_newGene_18498;Cannabis_sativa_newGene_18921;Cannabis_sativa_newGene_19605;Cannabis_sativa_newGene_9945;FN00076.1.g;FN01309.1.g;FN01811.1.g;FN31915.1.g	K00430+K13066+K00083+K00083+K01188+K01188+K18368+K01188+K13065+K18368+K09755+K23260
Endocytosis	ko04144	12	191	286	4964	Cannabis_sativa_newGene_13344;Cannabis_sativa_newGene_1525;Cannabis_sativa_newGene_19846;Cannabis_sativa_newGene_5802;Cannabis_sativa_newGene_6247;FN05727.1.g;FN09433.1.g;FN12580.1.g;FN13090.1.g;FN17566.1.g;FN21339.1.g;FN30530.1.g	K12190+K03283+K10365+K03283+K03283+K19476+K12489+K07897+K01115+K01115+K19476+K03283
RNA degradation	ko03018	11	106	286	4964	Cannabis_sativa_newGene_11252;Cannabis_sativa_newGene_11788;Cannabis_sativa_newGene_11948;Cannabis_sativa_newGene_1913;Cannabis_sativa_newGene_305;Cannabis_sativa_newGene_4364;FN09140.1.g;FN11764.1.g;FN13203.1.g;FN29936.1.g;FN32602.1.g	K12603+K18681+K04077+K04077+K04077+K12608+K13126+K00962+K00962+K13126+K00962
Glycolysis / Gluconeogenesis	ko00010	10	130	286	4964	Cannabis_sativa_newGene_152;Cannabis_sativa_newGene_18234;Cannabis_sativa_newGene_20337;Cannabis_sativa_newGene_22094;Cannabis_sativa_newGene_397;Cannabis_sativa_newGene_5452;Cannabis_sativa_newGene_7096;FN07641.1.g;FN10671.1.g;FN35110.1.g	K14085+K14085+K01006+K01624+K01006+K01623+K01810+K01792+K00121+K01568
Carbon metabolism	ko01200	10	230	286	4964	Cannabis_sativa_newGene_20337;Cannabis_sativa_newGene_20663;Cannabis_sativa_newGene_22094;Cannabis_sativa_newGene_397;Cannabis_sativa_newGene_5452;Cannabis_sativa_newGene_6450;Cannabis_sativa_newGene_6578;Cannabis_sativa_newGene_7096;FN10671.1.g;FN10966.1.g	K01006+K00600+K01624+K01006+K01623+K15919+K15919+K01810+K00121+K05605
Spliceosome	ko03040	9	179	286	4964	Cannabis_sativa_newGene_1525;Cannabis_sativa_newGene_2742;Cannabis_sativa_newGene_4378;Cannabis_sativa_newGene_5802;Cannabis_sativa_newGene_6247;Cannabis_sativa_newGene_8858;FN21739.1.g;FN30530.1.g;FN34405.1.g	K03283+K12824+K12818+K03283+K03283+K12818+K12857+K03283+K12823
ABC transporters	ko02010	9	105	286	4964	Cannabis_sativa_newGene_10304;Cannabis_sativa_newGene_6493;FN02711.1.g;FN11894.1.g;FN16767.1.g;FN16799.1.g;FN21357.1.g;FN22551.1.g;FN24888.1.g	K05665+K05658+K05666+K05665+K05666+K05681+K05658+K05666+K05643
Tryptophan metabolism	ko00380	8	57	286	4964	Cannabis_sativa_newGene_152;Cannabis_sativa_newGene_15605;Cannabis_sativa_newGene_18234;Cannabis_sativa_newGene_18995;Cannabis_sativa_newGene_20985;Cannabis_sativa_newGene_5596;Cannabis_sativa_newGene_9493;FN04800.1.g	K14085+K00837+K14085+K00837+K11816+K01426+K01426+K01593
Circadian rhythm - plant	ko04712	8	55	286	4964	Cannabis_sativa_newGene_10631;Cannabis_sativa_newGene_20855;Cannabis_sativa_newGene_314;FN13818.1.g;FN16671.1.g;FN23657.1.g;FN32626.1.g;FN33753.1.g	K16221+K12135+K12130+K16221+K10143+K12125+K16222+K12133
Glycerolipid metabolism	ko00561	7	74	286	4964	Cannabis_sativa_newGene_10707;Cannabis_sativa_newGene_152;Cannabis_sativa_newGene_18234;Cannabis_sativa_newGene_22025;Cannabis_sativa_newGene_2886;Cannabis_sativa_newGene_4530;Cannabis_sativa_newGene_9734	K03715+K14085+K14085+K06119+K06119+K00679+K00901
Ascorbate and aldarate metabolism	ko00053	7	72	286	4964	Cannabis_sativa_newGene_152;Cannabis_sativa_newGene_18234;Cannabis_sativa_newGene_2284;Cannabis_sativa_newGene_9211;FN05237.1.g;FN30130.1.g;FN35721.1.g	K14085+K14085+K00103+K00434+K08232+K00103+K14190
Zeatin biosynthesis	ko00908	7	35	286	4964	Cannabis_sativa_newGene_21427;Cannabis_sativa_newGene_4728;FN03804.1.g;FN08398.1.g;FN22039.1.g;FN25869.1.g;FN30838.1.g	K00279+K23452+K13496+K13496+K00279+K13493+K00791
RNA transport	ko03013	7	171	286	4964	Cannabis_sativa_newGene_20688;Cannabis_sativa_newGene_22008;Cannabis_sativa_newGene_6352;FN09140.1.g;FN24184.1.g;FN29936.1.g;FN33215.1.g	K14290+K14327+K14327+K13126+K14288+K13126+K12160
Biosynthesis of amino acids	ko01230	7	188	286	4964	Cannabis_sativa_newGene_10191;Cannabis_sativa_newGene_20663;Cannabis_sativa_newGene_22094;Cannabis_sativa_newGene_338;Cannabis_sativa_newGene_503;Cannabis_sativa_newGene_5452;FN27661.1.g	K00264+K00600+K01624+K01657+K14677+K01623+K14152
Glycine, serine and threonine metabolism	ko00260	6	58	286	4964	Cannabis_sativa_newGene_152;Cannabis_sativa_newGene_18234;Cannabis_sativa_newGene_20663;Cannabis_sativa_newGene_6450;Cannabis_sativa_newGene_6578;FN00839.1.g	K14085+K14085+K00600+K15919+K15919+K00306
Arginine and proline metabolism	ko00330	6	70	286	4964	Cannabis_sativa_newGene_11349;Cannabis_sativa_newGene_152;Cannabis_sativa_newGene_18234;Cannabis_sativa_newGene_5596;Cannabis_sativa_newGene_9493;FN26730.1.g	K13366+K14085+K14085+K01426+K01426+K00797

## Sheet: Table A7
Table A7. The KEGG pathway enrichment analysis of downregulated DEGs in group of Huoma No.1 under NaHCO3 stress.
#KEGG_n	134	KEGG_N	4964
#Pathway	ko_ID	Selected_gene_in_Pathway	AllGene_in_Pathway	Selected_gene_in_All_pathways	AllGene_in_All_pathways	Gene_id	KEGG_Orthology
Plant hormone signal transduction	ko04075	12	254	134	4964	Cannabis_sativa_newGene_11665;Cannabis_sativa_newGene_13162;Cannabis_sativa_newGene_22295;Cannabis_sativa_newGene_6744;FN01975.1.g;FN06226.1.g;FN06717.1.g;FN08356.1.g;FN09715.1.g;FN19162.1.g;FN31228.1.g;FN31613.1.g	K14488+K13415+K13422+K13416+K14487+K14431+K14515+K14488+K14486+K13449+K14431+K14494
MAPK signaling pathway - plant	ko04016	11	198	134	4964	Cannabis_sativa_newGene_1698;Cannabis_sativa_newGene_18285;Cannabis_sativa_newGene_19760;Cannabis_sativa_newGene_21649;Cannabis_sativa_newGene_22295;Cannabis_sativa_newGene_3854;Cannabis_sativa_newGene_6744;Cannabis_sativa_newGene_811;FN06717.1.g;FN10401.1.g;FN19162.1.g	K13420+K13447+K16224+K13447+K13422+K16224+K13416+K16224+K14515+K20606+K13449
Starch and sucrose metabolism	ko00500	10	203	134	4964	Cannabis_sativa_newGene_16402;Cannabis_sativa_newGene_4439;Cannabis_sativa_newGene_5366;Cannabis_sativa_newGene_7287;Cannabis_sativa_newGene_8778;Cannabis_sativa_newGene_9150;FN10222.1.g;FN10319.1.g;FN29762.1.g;FN32779.1.g	K19891+K01087+K00975+K00847+K01193+K01193+K01087+K00700+K16055+K01177
Homologous recombination	ko03440	8	89	134	4964	Cannabis_sativa_newGene_13837;Cannabis_sativa_newGene_15108;Cannabis_sativa_newGene_1681;Cannabis_sativa_newGene_17522;Cannabis_sativa_newGene_23262;Cannabis_sativa_newGene_3325;Cannabis_sativa_newGene_8810;FN08681.1.g	K03504+K10865+K20776+K02327+K02327+K02327+K15362+K12173
Phenylpropanoid biosynthesis	ko00940	7	180	134	4964	Cannabis_sativa_newGene_12769;Cannabis_sativa_newGene_12958;Cannabis_sativa_newGene_1949;Cannabis_sativa_newGene_21373;FN03710.1.g;FN24435.1.g;FN26783.1.g	K00083+K00083+K00430+K12355+K13065+K00430+K01904
Carbon metabolism	ko01200	6	230	134	4964	Cannabis_sativa_newGene_1680;Cannabis_sativa_newGene_18591;Cannabis_sativa_newGene_23528;FN10934.1.g;FN21026.1.g;FN27046.1.g	K00600+K00121+K18121+K00850+K00121+K02160
DNA replication	ko03030	6	54	134	4964	Cannabis_sativa_newGene_13837;Cannabis_sativa_newGene_17522;Cannabis_sativa_newGene_23262;Cannabis_sativa_newGene_3325;FN17620.1.g;FN30441.1.g	K03504+K02327+K02327+K02327+K02320+K02320
Amino sugar and nucleotide sugar metabolism	ko00520	6	152	134	4964	Cannabis_sativa_newGene_16721;Cannabis_sativa_newGene_5366;Cannabis_sativa_newGene_7287;FN07239.1.g;FN31465.1.g;FN36748.1.g	K15920+K00975+K00847+K05305+K05305+K05305
Base excision repair	ko03410	6	43	134	4964	Cannabis_sativa_newGene_13837;Cannabis_sativa_newGene_17522;Cannabis_sativa_newGene_23262;Cannabis_sativa_newGene_3325;FN09091.1.g;FN35723.1.g	K03504+K02327+K02327+K02327+K03648+K03575
Porphyrin and chlorophyll metabolism	ko00860	6	48	134	4964	Cannabis_sativa_newGene_14815;Cannabis_sativa_newGene_18819;Cannabis_sativa_newGene_22673;Cannabis_sativa_newGene_2697;Cannabis_sativa_newGene_7055;FN30376.1.g	K18010+K18010+K18010+K13071+K04040+K10960
Mismatch repair	ko03430	5	44	134	4964	Cannabis_sativa_newGene_13837;Cannabis_sativa_newGene_17522;Cannabis_sativa_newGene_23262;Cannabis_sativa_newGene_3325;FN22718.1.g	K03504+K02327+K02327+K02327+K07456
Fructose and mannose metabolism	ko00051	5	59	134	4964	Cannabis_sativa_newGene_7287;FN07239.1.g;FN10934.1.g;FN31465.1.g;FN36748.1.g	K00847+K05305+K00850+K05305+K05305
RNA transport	ko03013	5	171	134	4964	Cannabis_sativa_newGene_11663;Cannabis_sativa_newGene_13051;FN01031.1.g;FN07948.1.g;FN24955.1.g	K14298+K03257+K14303+K14300+K14311
Spliceosome	ko03040	4	179	134	4964	Cannabis_sativa_newGene_3316;Cannabis_sativa_newGene_5105;Cannabis_sativa_newGene_7807;FN04132.1.g	K12818+K12885+K12818+K12896
Ribosome	ko03010	4	127	134	4964	Cannabis_sativa_newGene_14881;FN15664.1.g;FN15789.1.g;FN34005.1.g	K02897+K02990+K02961+K02891
Carotenoid biosynthesis	ko00906	4	57	134	4964	Cannabis_sativa_newGene_13280;Cannabis_sativa_newGene_3997;FN08216.1.g;FN34364.1.g	K09837+K02293+K09835+K09839
Nucleotide excision repair	ko03420	4	65	134	4964	Cannabis_sativa_newGene_13837;Cannabis_sativa_newGene_17522;Cannabis_sativa_newGene_23262;Cannabis_sativa_newGene_3325	K03504+K02327+K02327+K02327
Glycerophospholipid metabolism	ko00564	4	78	134	4964	Cannabis_sativa_newGene_23724;Cannabis_sativa_newGene_471;Cannabis_sativa_newGene_622;FN01769.1.g	K01126+K01115+K01094+K01126
Glycolysis / Gluconeogenesis	ko00010	3	130	134	4964	Cannabis_sativa_newGene_18591;FN10934.1.g;FN21026.1.g	K00121+K00850+K00121
Terpenoid backbone biosynthesis	ko00900	3	36	134	4964	Cannabis_sativa_newGene_6266;FN12726.1.g;FN30376.1.g	K00787+K01662+K10960

## Sheet: Table A8
Table A8. The KEGG pathway enrichment analysis of downregulated DEGs in group of Jindao-15 under NaHCO3 stress.
#KEGG_n	356	KEGG_N	4964
#Pathway	ko_ID	Selected_gene_in_Pathway	AllGene_in_Pathway	Selected_gene_in_All_pathways	AllGene_in_All_pathways	Gene_id	KEGG_Orthology
Ribosome	ko03010	28	127	356	4964	Cannabis_sativa_newGene_1152;Cannabis_sativa_newGene_13606;Cannabis_sativa_newGene_16946;Cannabis_sativa_newGene_22616;Cannabis_sativa_newGene_3743;Cannabis_sativa_newGene_3893;Cannabis_sativa_newGene_4861;Cannabis_sativa_newGene_5608;Cannabis_sativa_newGene_6225;Cannabis_sativa_newGene_6479;Cannabis_sativa_newGene_7030;Cannabis_sativa_newGene_7370;Cannabis_sativa_newGene_8023;Cannabis_sativa_new…	K02936+K02975+K02875+K02934+K02933+K02865+K02936+K02865+K02989+K02990+K02936+K02987+K02896+K02882+K02908+K02974+K02905+K02917+K02960+K02880+K02925+K02966+K02891+K02910+K02995+K02974+K02873+K02997
Carbon metabolism	ko01200	23	230	356	4964	Cannabis_sativa_newGene_10622;Cannabis_sativa_newGene_10772;Cannabis_sativa_newGene_11167;Cannabis_sativa_newGene_11509;Cannabis_sativa_newGene_11543;Cannabis_sativa_newGene_12565;Cannabis_sativa_newGene_12934;Cannabis_sativa_newGene_15662;Cannabis_sativa_newGene_18996;Cannabis_sativa_newGene_19534;Cannabis_sativa_newGene_20269;Cannabis_sativa_newGene_20339;Cannabis_sativa_newGene_20779;Cannabis_…	K00297+K00640+K00600+K00121+K00927+K00616+K05298+K00031+K00873+K00058+K00236+K00134+K00134+K00161+K01810+K00031+K01810+K01689+K00600+K01895+K00028+K11517+K01738
Starch and sucrose metabolism	ko00500	22	203	356	4964	Cannabis_sativa_newGene_10620;Cannabis_sativa_newGene_11253;Cannabis_sativa_newGene_13505;Cannabis_sativa_newGene_15840;Cannabis_sativa_newGene_17906;Cannabis_sativa_newGene_18477;Cannabis_sativa_newGene_19090;Cannabis_sativa_newGene_20070;Cannabis_sativa_newGene_20594;Cannabis_sativa_newGene_22264;Cannabis_sativa_newGene_2254;Cannabis_sativa_newGene_2503;Cannabis_sativa_newGene_2984;Cannabis_sat…	K00847+K00963+K05350+K01188+K05349+K01179+K01188+K19891+K01188+K00975+K00975+K01810+K01179+K01810+K01187+K00705+K01187+K01179+K00705+K00963+K01177+K19892
Biosynthesis of amino acids	ko01230	20	188	356	4964	Cannabis_sativa_newGene_10772;Cannabis_sativa_newGene_11167;Cannabis_sativa_newGene_11543;Cannabis_sativa_newGene_12565;Cannabis_sativa_newGene_15662;Cannabis_sativa_newGene_18996;Cannabis_sativa_newGene_19534;Cannabis_sativa_newGene_2;Cannabis_sativa_newGene_20339;Cannabis_sativa_newGene_20779;Cannabis_sativa_newGene_22412;Cannabis_sativa_newGene_2991;Cannabis_sativa_newGene_5259;Cannabis_sativa…	K00640+K00600+K00927+K00616+K00031+K00873+K00058+K01739+K00134+K00134+K01693+K00031+K01689+K00003+K00600+K01653+K01760+K22846+K01940+K01738
Amino sugar and nucleotide sugar metabolism	ko00520	20	152	356	4964	Cannabis_sativa_newGene_10620;Cannabis_sativa_newGene_11253;Cannabis_sativa_newGene_12342;Cannabis_sativa_newGene_13872;Cannabis_sativa_newGene_13874;Cannabis_sativa_newGene_2219;Cannabis_sativa_newGene_22264;Cannabis_sativa_newGene_2254;Cannabis_sativa_newGene_23172;Cannabis_sativa_newGene_2503;Cannabis_sativa_newGene_3010;Cannabis_sativa_newGene_3651;Cannabis_sativa_newGene_4707;Cannabis_sativa…	K00847+K00963+K01183+K08678+K08678+K13648+K00975+K00975+K13648+K01810+K01810+K08678+K15920+K20547+K15920+K16190+K13648+K00963+K20547+K00326
Spliceosome	ko03040	17	179	356	4964	Cannabis_sativa_newGene_10385;Cannabis_sativa_newGene_11787;Cannabis_sativa_newGene_12591;Cannabis_sativa_newGene_14305;Cannabis_sativa_newGene_17427;Cannabis_sativa_newGene_22797;Cannabis_sativa_newGene_2903;Cannabis_sativa_newGene_4250;Cannabis_sativa_newGene_4251;Cannabis_sativa_newGene_6481;Cannabis_sativa_newGene_8350;Cannabis_sativa_newGene_9143;Cannabis_sativa_newGene_950;FN01497.1.g;FN127…	K12818+K12818+K12818+K12818+K12627+K12822+K12818+K12818+K12818+K12818+K12818+K12818+K11099+K12859+K12859+K12831+K12825
Protein processing in endoplasmic reticulum	ko04141	16	184	356	4964	Cannabis_sativa_newGene_10138;Cannabis_sativa_newGene_11911;Cannabis_sativa_newGene_12161;Cannabis_sativa_newGene_12899;Cannabis_sativa_newGene_16397;Cannabis_sativa_newGene_19447;Cannabis_sativa_newGene_20835;Cannabis_sativa_newGene_22419;Cannabis_sativa_newGene_2566;Cannabis_sativa_newGene_7935;Cannabis_sativa_newGene_8764;Cannabis_sativa_newGene_9702;FN02589.1.g;FN14534.1.g;FN15448.1.g;FN17555…	K10956+K12667+K05546+K08288+K11718+K11718+K09580+K12667+K05546+K12670+K11718+K16196+K10950+K08057+K01456+K10950
Pentose and glucuronate interconversions	ko00040	15	134	356	4964	Cannabis_sativa_newGene_11253;Cannabis_sativa_newGene_16143;Cannabis_sativa_newGene_20497;Cannabis_sativa_newGene_21482;Cannabis_sativa_newGene_2360;Cannabis_sativa_newGene_4735;Cannabis_sativa_newGene_600;Cannabis_sativa_newGene_6536;Cannabis_sativa_newGene_845;Cannabis_sativa_newGene_9001;Cannabis_sativa_newGene_9458;FN05725.1.g;FN18652.1.g;FN23510.1.g;FN26470.1.g	K00963+K01184+K01728+K01728+K01184+K01728+K01184+K01728+K16190+K01728+K00963+K01728+K01184+K01051+K01728
Plant hormone signal transduction	ko04075	15	254	356	4964	Cannabis_sativa_newGene_10921;Cannabis_sativa_newGene_13441;Cannabis_sativa_newGene_22823;Cannabis_sativa_newGene_23198;Cannabis_sativa_newGene_262;Cannabis_sativa_newGene_5606;Cannabis_sativa_newGene_594;Cannabis_sativa_newGene_7984;Cannabis_sativa_newGene_8381;FN00949.1.g;FN09376.1.g;FN11129.1.g;FN16505.1.g;FN22787.1.g;FN27051.1.g	K14484+K14486+K14504+K14491+K14510+K14484+K14484+K14508+K14504+K14486+K14494+K13449+K14491+K14491+K14489
Phenylpropanoid biosynthesis	ko00940	15	180	356	4964	Cannabis_sativa_newGene_10610;Cannabis_sativa_newGene_11195;Cannabis_sativa_newGene_13505;Cannabis_sativa_newGene_15840;Cannabis_sativa_newGene_17906;Cannabis_sativa_newGene_19090;Cannabis_sativa_newGene_20594;Cannabis_sativa_newGene_20815;Cannabis_sativa_newGene_4298;Cannabis_sativa_newGene_446;Cannabis_sativa_newGene_9136;FN00911.1.g;FN03930.1.g;FN28986.1.g;FN31725.1.g	K00588+K00430+K05350+K01188+K05349+K01188+K01188+K00588+K13066+K00430+K00430+K00430+K12355+K00430+K00430
Cysteine and methionine metabolism	ko00270	14	102	356	4964	Cannabis_sativa_newGene_10772;Cannabis_sativa_newGene_1434;Cannabis_sativa_newGene_14663;Cannabis_sativa_newGene_19534;Cannabis_sativa_newGene_2;Cannabis_sativa_newGene_20600;Cannabis_sativa_newGene_6391;Cannabis_sativa_newGene_6921;Cannabis_sativa_newGene_8373;FN10015.1.g;FN12218.1.g;FN12623.1.g;FN26521.1.g;FN35496.1.g	K00640+K01251+K01011+K00058+K01739+K00558+K05933+K05396+K00003+K01760+K22846+K00558+K05933+K01738
Glycolysis / Gluconeogenesis	ko00010	12	130	356	4964	Cannabis_sativa_newGene_11509;Cannabis_sativa_newGene_11543;Cannabis_sativa_newGene_11639;Cannabis_sativa_newGene_18996;Cannabis_sativa_newGene_20339;Cannabis_sativa_newGene_20779;Cannabis_sativa_newGene_21021;Cannabis_sativa_newGene_23072;Cannabis_sativa_newGene_2503;Cannabis_sativa_newGene_3010;Cannabis_sativa_newGene_5259;FN07791.1.g	K00121+K00927+K03103+K00873+K00134+K00134+K00161+K03103+K01810+K01810+K01689+K01895
Plant-pathogen interaction	ko04626	12	375	356	4964	Cannabis_sativa_newGene_11257;Cannabis_sativa_newGene_2393;Cannabis_sativa_newGene_8020;Cannabis_sativa_newGene_8414;FN06776.1.g;FN10294.1.g;FN11129.1.g;FN26976.1.g;FN29191.1.g;FN30576.1.g;FN32553.1.g;FN33477.1.g	K12795+K16225+K13457+K16224+K18878+K13457+K13449+K13448+K13430+K13435+K13420+K02183
Galactose metabolism	ko00052	12	107	356	4964	Cannabis_sativa_newGene_11253;Cannabis_sativa_newGene_11627;Cannabis_sativa_newGene_11714;Cannabis_sativa_newGene_11715;Cannabis_sativa_newGene_22518;Cannabis_sativa_newGene_3747;Cannabis_sativa_newGene_4598;Cannabis_sativa_newGene_5261;Cannabis_sativa_newGene_8403;Cannabis_sativa_newGene_9458;FN09180.1.g;FN24159.1.g	K00963+K12309+K12309+K12309+K12309+K01187+K01187+K12309+K12309+K00963+K12309+K18819
ABC transporters	ko02010	12	105	356	4964	Cannabis_sativa_newGene_10943;Cannabis_sativa_newGene_11339;Cannabis_sativa_newGene_13339;Cannabis_sativa_newGene_1861;Cannabis_sativa_newGene_3778;Cannabis_sativa_newGene_6071;Cannabis_sativa_newGene_8232;FN00945.1.g;FN10449.1.g;FN17340.1.g;FN22227.1.g;FN36565.1.g	K05657+K05658+K05658+K05658+K05658+K05665+K05658+K05658+K05658+K05658+K05666+K05658
Fatty acid biosynthesis	ko00061	9	44	356	4964	Cannabis_sativa_newGene_13126;Cannabis_sativa_newGene_17958;Cannabis_sativa_newGene_19350;Cannabis_sativa_newGene_20762;Cannabis_sativa_newGene_21014;Cannabis_sativa_newGene_2213;Cannabis_sativa_newGene_3059;Cannabis_sativa_newGene_9580;FN20686.1.g	K09458+K00059+K10781+K00648+K10782+K00059+K00059+K00059+K07512
RNA transport	ko03013	9	171	356	4964	Cannabis_sativa_newGene_203;Cannabis_sativa_newGene_20413;Cannabis_sativa_newGene_4351;FN03418.1.g;FN04418.1.g;FN13363.1.g;FN23082.1.g;FN26287.1.g;FN27539.1.g	K03239+K14318+K03537+K13114+K09291+K14307+K03257+K14294+K14292
Cyanoamino acid metabolism	ko00460	9	63	356	4964	Cannabis_sativa_newGene_11167;Cannabis_sativa_newGene_13505;Cannabis_sativa_newGene_15840;Cannabis_sativa_newGene_17906;Cannabis_sativa_newGene_19090;Cannabis_sativa_newGene_20594;Cannabis_sativa_newGene_969;Cannabis_sativa_newGene_9851;FN01949.1.g	K00600+K05350+K01188+K05349+K01188+K01188+K18592+K00600+K18592
Other glycan degradation	ko00511	9	70	356	4964	Cannabis_sativa_newGene_11627;Cannabis_sativa_newGene_11714;Cannabis_sativa_newGene_11715;Cannabis_sativa_newGene_22518;Cannabis_sativa_newGene_5261;Cannabis_sativa_newGene_8403;FN09180.1.g;FN12440.1.g;FN27285.1.g	K12309+K12309+K12309+K12309+K12309+K12309+K12309+K01206+K01206
Glycosaminoglycan degradation	ko00531	9	60	356	4964	Cannabis_sativa_newGene_11627;Cannabis_sativa_newGene_11714;Cannabis_sativa_newGene_11715;Cannabis_sativa_newGene_22518;Cannabis_sativa_newGene_5261;Cannabis_sativa_newGene_5506;Cannabis_sativa_newGene_7297;Cannabis_sativa_newGene_8403;FN09180.1.g	K12309+K12309+K12309+K12309+K12309+K10532+K01205+K12309+K12309

## Sheet: Table A9
Table A9. The KEGG pathway enrichment analysis of co-expressed upregulated DEGs under NaHCO3 stress.
#KEGG_n	553	KEGG_N	4964
#Pathway	ko_ID	Selected_gene_in_Pathway	AllGene_in_Pathway	Selected_gene_in_All_pathways	AllGene_in_All_pathways	Gene_id	KEGG_Orthology
Plant hormone signal transduction	ko04075	49	254	553	4964	Cannabis_sativa_newGene_10192;Cannabis_sativa_newGene_10514;Cannabis_sativa_newGene_10795;Cannabis_sativa_newGene_10957;Cannabis_sativa_newGene_11371;Cannabis_sativa_newGene_1282;Cannabis_sativa_newGene_13657;Cannabis_sativa_newGene_15113;Cannabis_sativa_newGene_15589;Cannabis_sativa_newGene_16241;Cannabis_sativa_newGene_17468;Cannabis_sativa_newGene_17681;Cannabis_sativa_newGene_18422;Cannabis_s…	K13464+K13416+K14486+K13422+K13464+K13464+K13464+K13415+K14484+K14484+K13464+K14497+K13415+K13415+K13464+K14497+K13416+K13416+K14494+K13416+K14510+K13416+K14498+K13422+K14494+K12126+K13416+K14498+K13416+K14489+K14491+K14503+K14497+K13416+K12126+K14488+K14493+K13415+K14497+K13415+K14488+K13416+K13415+K14494+K14494+K14491+K14488+K14484+K13416
MAPK signaling pathway - plant	ko04016	43	198	553	4964	Cannabis_sativa_newGene_10514;Cannabis_sativa_newGene_10863;Cannabis_sativa_newGene_10957;Cannabis_sativa_newGene_12047;Cannabis_sativa_newGene_17681;Cannabis_sativa_newGene_20310;Cannabis_sativa_newGene_23054;Cannabis_sativa_newGene_23257;Cannabis_sativa_newGene_3396;Cannabis_sativa_newGene_3785;Cannabis_sativa_newGene_4708;Cannabis_sativa_newGene_5395;Cannabis_sativa_newGene_617;Cannabis_sativa…	K13416+K16224+K13422+K20728+K14497+K13424+K13425+K13424+K14497+K13416+K13416+K13416+K14510+K13416+K14498+K13422+K16224+K20772+K20714+K13416+K00940+K20772+K14498+K13416+K02183+K20772+K20718+K14497+K13416+K13425+K20716+K13425+K20536+K13424+K16224+K03781+K14497+K13416+K20716+K20716+K20716+K20725+K13416
Carbon metabolism	ko01200	30	230	553	4964	Cannabis_sativa_newGene_11517;Cannabis_sativa_newGene_11629;Cannabis_sativa_newGene_12180;Cannabis_sativa_newGene_12274;Cannabis_sativa_newGene_1298;Cannabis_sativa_newGene_13290;Cannabis_sativa_newGene_13475;Cannabis_sativa_newGene_15077;Cannabis_sativa_newGene_1818;Cannabis_sativa_newGene_20278;Cannabis_sativa_newGene_20440;Cannabis_sativa_newGene_20747;Cannabis_sativa_newGene_21116;Cannabis_sa…	K00261+K00948+K01610+K00232+K01610+K03841+K00232+K01638+K23146+K01913+K00850+K00232+K23146+K03841+K00261+K00029+K01610+K01647+K00232+K01647+K00261+K01610+K00863+K01610+K01637+K01595+K01803+K00927+K03781+K00851
Phenylpropanoid biosynthesis	ko00940	25	180	553	4964	Cannabis_sativa_newGene_11070;Cannabis_sativa_newGene_1108;Cannabis_sativa_newGene_13;Cannabis_sativa_newGene_13075;Cannabis_sativa_newGene_13396;Cannabis_sativa_newGene_14418;Cannabis_sativa_newGene_19667;Cannabis_sativa_newGene_20791;Cannabis_sativa_newGene_23210;Cannabis_sativa_newGene_3684;Cannabis_sativa_newGene_3685;Cannabis_sativa_newGene_4195;Cannabis_sativa_newGene_4722;FN01808.1.g;FN074…	K18368+K00430+K01188+K05349+K23260+K09753+K00430+K01904+K12355+K01904+K01904+K00430+K01904+K09753+K00083+K01188+K22395+K13065+K23260+K00430+K10775+K00430+K12355+K22395+K22395
Starch and sucrose metabolism	ko00500	25	203	553	4964	Cannabis_sativa_newGene_10275;Cannabis_sativa_newGene_12016;Cannabis_sativa_newGene_13;Cannabis_sativa_newGene_13075;Cannabis_sativa_newGene_13108;Cannabis_sativa_newGene_13670;Cannabis_sativa_newGene_17424;Cannabis_sativa_newGene_17785;Cannabis_sativa_newGene_2192;Cannabis_sativa_newGene_3096;Cannabis_sativa_newGene_5139;Cannabis_sativa_newGene_7707;FN05145.1.g;FN08139.1.g;FN11744.1.g;FN14315.1.…	K01177+K19891+K01188+K05349+K01210+K01177+K01193+K13679+K19891+K01177+K01177+K01177+K01176+K01188+K16055+K00696+K01193+K01176+K16055+K01087+K00750+K16055+K00703+K16055+K01176
Endocytosis	ko04144	23	191	553	4964	Cannabis_sativa_newGene_10843;Cannabis_sativa_newGene_12603;Cannabis_sativa_newGene_13259;Cannabis_sativa_newGene_18556;Cannabis_sativa_newGene_20923;Cannabis_sativa_newGene_22184;Cannabis_sativa_newGene_758;Cannabis_sativa_newGene_9350;FN00657.1.g;FN03519.1.g;FN07602.1.g;FN09178.1.g;FN10041.1.g;FN14007.1.g;FN23888.1.g;FN25590.1.g;FN29193.1.g;FN29773.1.g;FN30465.1.g;FN31547.1.g;FN32082.1.g;FN3542…	K01115+K12200+K19476+K12486+K12199+K12486+K01115+K12200+K19476+K19476+K03283+K19476+K12483+K12486+K07937+K01115+K19476+K19476+K01115+K12486+K12184+K01115+K03283
Glycerophospholipid metabolism	ko00564	20	78	553	4964	Cannabis_sativa_newGene_10843;Cannabis_sativa_newGene_12374;Cannabis_sativa_newGene_2962;Cannabis_sativa_newGene_3028;Cannabis_sativa_newGene_5196;Cannabis_sativa_newGene_5981;Cannabis_sativa_newGene_758;Cannabis_sativa_newGene_8723;FN02448.1.g;FN03123.1.g;FN11336.1.g;FN11582.1.g;FN14035.1.g;FN25590.1.g;FN26262.1.g;FN26278.1.g;FN26655.1.g;FN28943.1.g;FN30465.1.g;FN35422.1.g	K01115+K00999+K00901+K15728+K00901+K13511+K01115+K00993+K16818+K00901+K00901+K00901+K00901+K01115+K16818+K00993+K00993+K14156+K01115+K01115
Phosphatidylinositol signaling system	ko04070	19	74	553	4964	Cannabis_sativa_newGene_12374;Cannabis_sativa_newGene_15636;Cannabis_sativa_newGene_17125;Cannabis_sativa_newGene_2962;Cannabis_sativa_newGene_4161;Cannabis_sativa_newGene_5196;Cannabis_sativa_newGene_9388;FN00287.1.g;FN03123.1.g;FN05304.1.g;FN10852.1.g;FN11336.1.g;FN11582.1.g;FN12085.1.g;FN14035.1.g;FN15226.1.g;FN15364.1.g;FN20383.1.g;FN29861.1.g	K00999+K05857+K18081+K00901+K05857+K00901+K10572+K00921+K00901+K00921+K02183+K00901+K00901+K00921+K00901+K00921+K13024+K00921+K18081
ABC transporters	ko02010	18	105	553	4964	Cannabis_sativa_newGene_12055;Cannabis_sativa_newGene_12853;Cannabis_sativa_newGene_1388;Cannabis_sativa_newGene_1607;Cannabis_sativa_newGene_20494;Cannabis_sativa_newGene_2513;Cannabis_sativa_newGene_324;Cannabis_sativa_newGene_8491;Cannabis_sativa_newGene_9291;Cannabis_sativa_newGene_9449;FN00443.1.g;FN04906.1.g;FN11981.1.g;FN14029.1.g;FN22744.1.g;FN32755.1.g;FN34130.1.g;FN36140.1.g	K05681+K08712+K05681+K05665+K05643+K05665+K05665+K05666+K05665+K08712+K05643+K05666+K05658+K05681+K05665+K05681+K05681+K05665
Amino sugar and nucleotide sugar metabolism	ko00520	17	152	553	4964	Cannabis_sativa_newGene_10303;Cannabis_sativa_newGene_10776;Cannabis_sativa_newGene_11187;Cannabis_sativa_newGene_12476;Cannabis_sativa_newGene_13832;Cannabis_sativa_newGene_14825;Cannabis_sativa_newGene_17763;Cannabis_sativa_newGene_20666;Cannabis_sativa_newGene_23015;Cannabis_sativa_newGene_3480;Cannabis_sativa_newGene_5475;Cannabis_sativa_newGene_7999;Cannabis_sativa_newGene_9085;Cannabis_sati…	K01183+K01183+K12446+K12448+K01183+K01784+K01183+K15920+K01183+K12446+K01209+K01183+K12446+K01209+K01183+K01183+K15920
Biosynthesis of amino acids	ko01230	15	188	553	4964	Cannabis_sativa_newGene_11629;Cannabis_sativa_newGene_12150;Cannabis_sativa_newGene_15331;Cannabis_sativa_newGene_20440;Cannabis_sativa_newGene_21205;Cannabis_sativa_newGene_22574;Cannabis_sativa_newGene_4785;Cannabis_sativa_newGene_5439;Cannabis_sativa_newGene_7124;FN01592.1.g;FN11691.1.g;FN12542.1.g;FN22387.1.g;FN25789.1.g;FN28477.1.g	K00948+K01476+K00826+K00850+K01850+K10206+K01647+K01647+K01620+K01953+K01476+K01803+K00927+K05359+K00891
Circadian rhythm - plant	ko04712	15	55	553	4964	Cannabis_sativa_newGene_13196;Cannabis_sativa_newGene_1781;Cannabis_sativa_newGene_19827;Cannabis_sativa_newGene_22369;Cannabis_sativa_newGene_23011;Cannabis_sativa_newGene_9425;FN04577.1.g;FN09695.1.g;FN11000.1.g;FN14367.1.g;FN16511.1.g;FN29221.1.g;FN32051.1.g;FN32277.1.g;FN32435.1.g	K12127+K16240+K12116+K12124+K12135+K10143+K12126+K16241+K12118+K12135+K12126+K12124+K12124+K12130+K16222
Protein processing in endoplasmic reticulum	ko04141	15	184	553	4964	Cannabis_sativa_newGene_15246;Cannabis_sativa_newGene_1797;Cannabis_sativa_newGene_21762;Cannabis_sativa_newGene_21811;Cannabis_sativa_newGene_4503;Cannabis_sativa_newGene_6645;Cannabis_sativa_newGene_7002;FN07260.1.g;FN07602.1.g;FN14193.1.g;FN17792.1.g;FN19649.1.g;FN21497.1.g;FN23018.1.g;FN35987.1.g	K09540+K04079+K03094+K08852+K10661+K01456+K10666+K13525+K03283+K01456+K13989+K14016+K14016+K13993+K03283
Inositol phosphate metabolism	ko00562	15	75	553	4964	Cannabis_sativa_newGene_12374;Cannabis_sativa_newGene_15636;Cannabis_sativa_newGene_17125;Cannabis_sativa_newGene_21118;Cannabis_sativa_newGene_4161;Cannabis_sativa_newGene_9388;FN00046.1.g;FN00287.1.g;FN05304.1.g;FN05692.1.g;FN12085.1.g;FN12542.1.g;FN15226.1.g;FN20383.1.g;FN29861.1.g	K00999+K05857+K18081+K00469+K05857+K10572+K00469+K00921+K00921+K24221+K00921+K01803+K00921+K00921+K18081
Galactose metabolism	ko00052	15	107	553	4964	Cannabis_sativa_newGene_14825;Cannabis_sativa_newGene_1496;Cannabis_sativa_newGene_17424;Cannabis_sativa_newGene_19735;Cannabis_sativa_newGene_20309;Cannabis_sativa_newGene_20440;Cannabis_sativa_newGene_22584;Cannabis_sativa_newGene_6842;Cannabis_sativa_newGene_8977;Cannabis_sativa_newGene_9048;FN12575.1.g;FN14480.1.g;FN18917.1.g;FN25960.1.g;FN30545.1.g	K01784+K12309+K01193+K12309+K06617+K00850+K12309+K12309+K06617+K18819+K06617+K01193+K12309+K06617+K06617
Peroxisome	ko04146	14	80	553	4964	Cannabis_sativa_newGene_12274;Cannabis_sativa_newGene_12684;Cannabis_sativa_newGene_13475;Cannabis_sativa_newGene_20747;Cannabis_sativa_newGene_20769;Cannabis_sativa_newGene_22704;Cannabis_sativa_newGene_5420;FN00751.1.g;FN17740.1.g;FN18486.1.g;FN23295.1.g;FN27556.1.g;FN28871.1.g;FN30475.1.g	K00232+K13342+K00232+K00232+K13342+K13348+K00232+K13343+K13337+K03426+K03781+K01640+K13344+K13344
mRNA surveillance pathway	ko03015	13	113	553	4964	Cannabis_sativa_newGene_18265;Cannabis_sativa_newGene_20509;Cannabis_sativa_newGene_9384;FN04571.1.g;FN05276.1.g;FN05815.1.g;FN06951.1.g;FN13508.1.g;FN19606.1.g;FN22269.1.g;FN23311.1.g;FN27327.1.g;FN28403.1.g	K14328+K14326+K14328+K14326+K14400+K06269+K11584+K03265+K14396+K11583+K14409+K03265+K06100
Glycolysis / Gluconeogenesis	ko00010	12	130	553	4964	Cannabis_sativa_newGene_12180;Cannabis_sativa_newGene_1298;Cannabis_sativa_newGene_13290;Cannabis_sativa_newGene_18200;Cannabis_sativa_newGene_20278;Cannabis_sativa_newGene_20440;Cannabis_sativa_newGene_21775;Cannabis_sativa_newGene_4759;Cannabis_sativa_newGene_6282;Cannabis_sativa_newGene_8426;FN12542.1.g;FN22387.1.g	K01610+K01610+K03841+K00128+K01913+K00850+K03841+K01610+K01610+K01610+K01803+K00927
beta-Alanine metabolism	ko00410	12	48	553	4964	Cannabis_sativa_newGene_12274;Cannabis_sativa_newGene_13475;Cannabis_sativa_newGene_14721;Cannabis_sativa_newGene_17472;Cannabis_sativa_newGene_1818;Cannabis_sativa_newGene_18200;Cannabis_sativa_newGene_20747;Cannabis_sativa_newGene_21116;Cannabis_sativa_newGene_5420;FN04409.1.g;FN28409.1.g;FN29670.1.g	K00232+K00232+K01580+K00276+K23146+K00128+K00232+K23146+K00232+K00276+K01580+K00276
Carbon fixation in photosynthetic organisms	ko00710	11	64	553	4964	Cannabis_sativa_newGene_12180;Cannabis_sativa_newGene_1298;Cannabis_sativa_newGene_13290;Cannabis_sativa_newGene_21775;Cannabis_sativa_newGene_2832;Cannabis_sativa_newGene_4759;Cannabis_sativa_newGene_6282;Cannabis_sativa_newGene_8426;FN05118.1.g;FN12542.1.g;FN22387.1.g	K01610+K01610+K03841+K03841+K00029+K01610+K01610+K01610+K01595+K01803+K00927

## Sheet: Table A10
Table A10. The KEGG pathway enrichment analysis of co-expressed downregulated DEGs under NaHCO3 stress.
#KEGG_n	423	KEGG_N	4964
#Pathway	ko_ID	Selected_gene_in_Pathway	AllGene_in_Pathway	Selected_gene_in_All_pathways	AllGene_in_All_pathways	Gene_id	KEGG_Orthology
Plant hormone signal transduction	ko04075	28	254	423	4964	Cannabis_sativa_newGene_12258;Cannabis_sativa_newGene_12559;Cannabis_sativa_newGene_14700;Cannabis_sativa_newGene_18507;Cannabis_sativa_newGene_19833;Cannabis_sativa_newGene_21325;Cannabis_sativa_newGene_4992;Cannabis_sativa_newGene_5713;Cannabis_sativa_newGene_6402;Cannabis_sativa_newGene_767;Cannabis_sativa_newGene_8449;Cannabis_sativa_newGene_8741;FN02746.1.g;FN04928.1.g;FN05463.1.g;FN11571.1.…	K14494+K13416+K13416+K13946+K14510+K14484+K13464+K14484+K13946+K14500+K13415+K14494+K13449+K14494+K14486+K14489+K13415+K14486+K14491+K13415+K13415+K14488+K14486+K14486+K14484+K14487+K13415+K13449
MAPK signaling pathway - plant	ko04016	25	198	423	4964	Cannabis_sativa_newGene_10841;Cannabis_sativa_newGene_11719;Cannabis_sativa_newGene_11924;Cannabis_sativa_newGene_12559;Cannabis_sativa_newGene_1309;Cannabis_sativa_newGene_14700;Cannabis_sativa_newGene_19833;Cannabis_sativa_newGene_20735;Cannabis_sativa_newGene_21398;Cannabis_sativa_newGene_23642;Cannabis_sativa_newGene_490;Cannabis_sativa_newGene_5269;Cannabis_sativa_newGene_5400;Cannabis_sativ…	K16224+K16224+K20558+K13416+K16224+K13416+K14510+K20557+K16224+K16224+K20718+K16224+K16224+K16224+K16224+K00940+K13420+K13449+K20547+K17686+K20728+K17686+K20718+K13449+K20718
Starch and sucrose metabolism	ko00500	24	203	423	4964	Cannabis_sativa_newGene_11429;Cannabis_sativa_newGene_16546;Cannabis_sativa_newGene_17075;Cannabis_sativa_newGene_19686;Cannabis_sativa_newGene_2019;Cannabis_sativa_newGene_20623;Cannabis_sativa_newGene_21963;Cannabis_sativa_newGene_2520;Cannabis_sativa_newGene_2684;Cannabis_sativa_newGene_347;Cannabis_sativa_newGene_6499;Cannabis_sativa_newGene_7402;Cannabis_sativa_newGene_7677;Cannabis_sativa_n…	K01179+K00705+K01179+K05349+K01193+K19891+K19891+K01179+K01179+K19891+K01179+K01179+K00705+K05349+K01193+K01214+K01176+K01179+K01193+K13679+K01179+K01179+K01179+K16055
Phenylpropanoid biosynthesis	ko00940	23	180	423	4964	Cannabis_sativa_newGene_10278;Cannabis_sativa_newGene_12946;Cannabis_sativa_newGene_13409;Cannabis_sativa_newGene_15015;Cannabis_sativa_newGene_1518;Cannabis_sativa_newGene_16671;Cannabis_sativa_newGene_17910;Cannabis_sativa_newGene_19686;Cannabis_sativa_newGene_2140;Cannabis_sativa_newGene_3087;Cannabis_sativa_newGene_3225;Cannabis_sativa_newGene_464;Cannabis_sativa_newGene_5041;Cannabis_sativa_…	K01904+K00430+K12355+K00430+K12355+K00430+K00430+K05349+K09753+K00430+K00430+K00430+K09753+K00430+K00430+K00430+K05349+K00430+K09753+K00430+K00430+K23260+K00430
Carbon metabolism	ko01200	21	230	423	4964	Cannabis_sativa_newGene_11095;Cannabis_sativa_newGene_11248;Cannabis_sativa_newGene_11258;Cannabis_sativa_newGene_12065;Cannabis_sativa_newGene_13147;Cannabis_sativa_newGene_15097;Cannabis_sativa_newGene_17485;Cannabis_sativa_newGene_17945;Cannabis_sativa_newGene_1842;Cannabis_sativa_newGene_20040;Cannabis_sativa_newGene_456;Cannabis_sativa_newGene_5221;Cannabis_sativa_newGene_6612;Cannabis_sativ…	K01595+K00036+K00281+K01079+K19269+K00058+K19269+K00382+K00134+K01595+K00058+K00382+K00162+K14454+K01689+K00297+K02160+K01803+K01834+K01623+K01807
DNA replication	ko03030	20	54	423	4964	Cannabis_sativa_newGene_10183;Cannabis_sativa_newGene_11102;Cannabis_sativa_newGene_11718;Cannabis_sativa_newGene_13322;Cannabis_sativa_newGene_21143;Cannabis_sativa_newGene_21226;Cannabis_sativa_newGene_21999;Cannabis_sativa_newGene_22891;Cannabis_sativa_newGene_2916;Cannabis_sativa_newGene_3191;Cannabis_sativa_newGene_3378;Cannabis_sativa_newGene_3995;Cannabis_sativa_newGene_7931;Cannabis_sativ…	K02685+K02542+K10739+K02541+K02542+K10743+K04799+K04799+K10747+K10739+K02541+K04802+K04802+K10742+K02321+K02210+K02320+K02684+K10744+K03111
Amino sugar and nucleotide sugar metabolism	ko00520	17	152	423	4964	Cannabis_sativa_newGene_11995;Cannabis_sativa_newGene_17146;Cannabis_sativa_newGene_2017;Cannabis_sativa_newGene_23469;Cannabis_sativa_newGene_6166;Cannabis_sativa_newGene_7195;Cannabis_sativa_newGene_7810;Cannabis_sativa_newGene_9991;FN03359.1.g;FN08944.1.g;FN12368.1.g;FN14420.1.g;FN21592.1.g;FN23369.1.g;FN25250.1.g;FN26406.1.g;FN33708.1.g	K16190+K00972+K08678+K13379+K00972+K15920+K00972+K12447+K13379+K15920+K20547+K13648+K08679+K12373+K02377+K05305+K15920
Glycolysis / Gluconeogenesis	ko00010	17	130	423	4964	Cannabis_sativa_newGene_12867;Cannabis_sativa_newGene_13616;Cannabis_sativa_newGene_14138;Cannabis_sativa_newGene_17945;Cannabis_sativa_newGene_1842;Cannabis_sativa_newGene_21596;Cannabis_sativa_newGene_21945;Cannabis_sativa_newGene_23504;Cannabis_sativa_newGene_4303;Cannabis_sativa_newGene_5221;Cannabis_sativa_newGene_6612;Cannabis_sativa_newGene_7950;Cannabis_sativa_newGene_9898;FN13979.1.g;FN2…	K00128+K00895+K00895+K00382+K00134+K00895+K00001+K00895+K01785+K00382+K00162+K00128+K01689+K00001+K01803+K01834+K01623
Pentose and glucuronate interconversions	ko00040	17	134	423	4964	Cannabis_sativa_newGene_11995;Cannabis_sativa_newGene_12677;Cannabis_sativa_newGene_12803;Cannabis_sativa_newGene_15479;Cannabis_sativa_newGene_18602;Cannabis_sativa_newGene_20922;Cannabis_sativa_newGene_22344;Cannabis_sativa_newGene_643;Cannabis_sativa_newGene_7633;Cannabis_sativa_newGene_9991;FN04870.1.g;FN09548.1.g;FN10147.1.g;FN17399.1.g;FN23124.1.g;FN25345.1.g;FN34221.1.g	K16190+K01184+K01051+K01728+K01728+K01728+K01051+K01728+K01213+K12447+K01051+K01213+K01051+K01184+K01213+K01051+K01213
Biosynthesis of amino acids	ko01230	15	188	423	4964	Cannabis_sativa_newGene_10100;Cannabis_sativa_newGene_11595;Cannabis_sativa_newGene_12065;Cannabis_sativa_newGene_15097;Cannabis_sativa_newGene_1842;Cannabis_sativa_newGene_19406;Cannabis_sativa_newGene_456;Cannabis_sativa_newGene_7459;Cannabis_sativa_newGene_9061;Cannabis_sativa_newGene_9898;FN21734.1.g;FN23633.1.g;FN25392.1.g;FN25957.1.g;FN29429.1.g	K12524+K12524+K01079+K00058+K00134+K01687+K00058+K01687+K14454+K01689+K01803+K01834+K00789+K01623+K01807
Galactose metabolism	ko00052	14	107	423	4964	Cannabis_sativa_newGene_11673;Cannabis_sativa_newGene_12352;Cannabis_sativa_newGene_14098;Cannabis_sativa_newGene_2019;Cannabis_sativa_newGene_2437;Cannabis_sativa_newGene_4303;Cannabis_sativa_newGene_909;Cannabis_sativa_newGene_9239;Cannabis_sativa_newGene_9991;FN01794.1.g;FN06437.1.g;FN07123.1.g;FN09084.1.g;FN19765.1.g	K12309+K12309+K07407+K01193+K12309+K01785+K01193+K12309+K12447+K12309+K18819+K01193+K18819+K12309
Cysteine and methionine metabolism	ko00270	13	102	423	4964	Cannabis_sativa_newGene_10100;Cannabis_sativa_newGene_11595;Cannabis_sativa_newGene_13748;Cannabis_sativa_newGene_15097;Cannabis_sativa_newGene_21522;Cannabis_sativa_newGene_23579;Cannabis_sativa_newGene_4225;Cannabis_sativa_newGene_456;Cannabis_sativa_newGene_9061;FN00601.1.g;FN07069.1.g;FN25392.1.g;FN28336.1.g	K12524+K12524+K00815+K00058+K00558+K00558+K00558+K00058+K14454+K00558+K00558+K00789+K00558
Purine metabolism	ko00230	12	79	423	4964	Cannabis_sativa_newGene_12402;Cannabis_sativa_newGene_14396;Cannabis_sativa_newGene_16034;Cannabis_sativa_newGene_19660;Cannabis_sativa_newGene_22031;Cannabis_sativa_newGene_22471;Cannabis_sativa_newGene_3806;Cannabis_sativa_newGene_5748;Cannabis_sativa_newGene_6439;Cannabis_sativa_newGene_8490;FN21684.1.g;FN30074.1.g	K14977+K00760+K00759+K14977+K01466+K10807+K10807+K03787+K03787+K00940+K01466+K13811
Oxidative phosphorylation	ko00190	12	72	423	4964	Cannabis_sativa_newGene_10956;Cannabis_sativa_newGene_11841;Cannabis_sativa_newGene_11842;Cannabis_sativa_newGene_1987;Cannabis_sativa_newGene_21916;Cannabis_sativa_newGene_22951;Cannabis_sativa_newGene_3084;Cannabis_sativa_newGene_6103;Cannabis_sativa_newGene_6808;Cannabis_sativa_newGene_9668;FN01282.1.g;FN06572.1.g	K01535+K01535+K01535+K01535+K01507+K02140+K01535+K01535+K03952+K01535+K01535+K03955
Tryptophan metabolism	ko00380	11	57	423	4964	Cannabis_sativa_newGene_12867;Cannabis_sativa_newGene_15881;Cannabis_sativa_newGene_17945;Cannabis_sativa_newGene_5221;Cannabis_sativa_newGene_6489;Cannabis_sativa_newGene_7692;Cannabis_sativa_newGene_7950;Cannabis_sativa_newGene_9017;FN03870.1.g;FN06904.1.g;FN18330.1.g	K00128+K23947+K00382+K00382+K16903+K16903+K00128+K22588+K22588+K01426+K01426
Ascorbate and aldarate metabolism	ko00053	11	72	423	4964	Cannabis_sativa_newGene_10419;Cannabis_sativa_newGene_11995;Cannabis_sativa_newGene_12598;Cannabis_sativa_newGene_12867;Cannabis_sativa_newGene_13985;Cannabis_sativa_newGene_2203;Cannabis_sativa_newGene_3741;Cannabis_sativa_newGene_7950;Cannabis_sativa_newGene_9991;FN01834.1.g;FN26257.1.g	K00423+K16190+K00103+K00128+K00423+K00423+K08232+K00128+K12447+K14190+K00423
Glycine, serine and threonine metabolism	ko00260	10	58	423	4964	Cannabis_sativa_newGene_10100;Cannabis_sativa_newGene_11258;Cannabis_sativa_newGene_11595;Cannabis_sativa_newGene_12065;Cannabis_sativa_newGene_15097;Cannabis_sativa_newGene_17945;Cannabis_sativa_newGene_456;Cannabis_sativa_newGene_5221;Cannabis_sativa_newGene_7856;FN23633.1.g	K12524+K00281+K12524+K01079+K00058+K00382+K00058+K00382+K12235+K01834
Protein processing in endoplasmic reticulum	ko04141	10	184	423	4964	Cannabis_sativa_newGene_1045;Cannabis_sativa_newGene_20665;Cannabis_sativa_newGene_2121;FN04735.1.g;FN11570.1.g;FN13707.1.g;FN15313.1.g;FN25983.1.g;FN26954.1.g;FN29581.1.g	K12668+K09584+K06689+K07953+K09487+K08054+K08057+K01456+K09490+K01456
Fructose and mannose metabolism	ko00051	10	59	423	4964	Cannabis_sativa_newGene_12326;Cannabis_sativa_newGene_13616;Cannabis_sativa_newGene_14138;Cannabis_sativa_newGene_21416;Cannabis_sativa_newGene_21596;Cannabis_sativa_newGene_23504;FN21734.1.g;FN25250.1.g;FN25957.1.g;FN26406.1.g	K19355+K00895+K00895+K19355+K00895+K00895+K01803+K02377+K01623+K05305
Fatty acid metabolism	ko01212	9	64	423	4964	Cannabis_sativa_newGene_13070;Cannabis_sativa_newGene_15882;Cannabis_sativa_newGene_16478;Cannabis_sativa_newGene_18976;Cannabis_sativa_newGene_21990;Cannabis_sativa_newGene_2373;FN06921.1.g;FN20814.1.g;FN24783.1.g	K00645+K02372+K01074+K01074+K10251+K00645+K10781+K02160+K01897
