# Supplementary material for: The miRNA–mRNA regulatory networks of the response to NaHCO3 stress in industrial hemp (Cannabis sativa L.)
Source: BMC Plant Biol. 2023 Oct 24;23:509. doi: 10.1186/s12870-023-04463-w (PMC10594861; doi:10.1186/s12870-023-04463-w)
Supplement: Supplementary file 2 — Additional file 2: Table A3. The quality of miRNA sequence data in three replicates for all samples. [file 12870_2023_4463_MOESM2_ESM.xlsx]

## Sheet: Sheet1
Supplementary materials_3. The network of miRNA–mRNA interactions involving 16 miRNAs and 179 mRNAs among Huoma No. 1 and Jindao-15.
#miRNAID	FDR_miR	log2FC_miR	miR_regulate	Tar_mRNAID	FDR	DESeq2_log2FC	Tar_regulate
novel_miR_123	13231.7	16964	up	FN05800.1.g	8.69e-14	2.02253	up	H
novel_miR_123	13231.7	16964	up	FN21555.1.g	1.99e-24	2.15484	up	H
novel_miR_123	13231.7	16964	up	FN02335.1.g	4.64e-06	-2.10501	down	H
novel_miR_123	13231.7	16964	up	FN00879.1.g	2.1e-05	1.1317	up	H
novel_miR_123	13231.7	16964	up	FN32694.1.g	1.04e-05	1.03982	up	H
novel_miR_123	13231.7	16964	up	FN00924.1.g	5.81e-05	-1.85745	down	H
novel_miR_123	13231.7	16964	up	FN21665.1.g	1.53e-06	1.82959	up	H
novel_miR_123	13231.7	16964	up	FN14407.1.g	0.00396681	-1.00281	down	H
novel_miR_123	13231.7	16964	up	FN27862.1.g	9.18e-17	-3.21325	down	H
novel_miR_123	13231.7	16964	up	FN10582.1.g	2.27e-18	-2.15258	down	H
novel_miR_123	13231.7	16964	up	FN14943.1.g	0.00572546	1.0817	up	H
novel_miR_123	13231.7	16964	up	FN01679.1.g	9.84e-08	1.85113	up	H
novel_miR_123	13231.7	16964	up	FN25584.1.g	1.17e-49	4.20161	up	H
novel_miR_123	13231.7	16964	up	FN36767.1.g	7.32e-08	-1.22026	down	H
novel_miR_123	13231.7	16964	up	FN34183.1.g	5.3e-08	1.50439	up	H
novel_miR_123	13231.7	16964	up	FN11557.1.g	7.84e-07	1.43682	up	H
novel_miR_123	13231.7	16964	up	FN26076.1.g	0.00612655	1.1409	up	H
novel_miR_123	13231.7	16964	up	FN06303.1.g	1.79e-28	1.78717	up	H
novel_miR_123	13231.7	16964	up	FN00096.1.g	1.97e-48	3.02288	up	H
novel_miR_123	13231.7	16964	up	FN07379.1.g	1.59e-35	3.66914	up	H
novel_miR_123	13231.7	16964	up	FN31996.1.g	0.000206129	3.85408	up	H
novel_miR_123	13231.7	16964	up	FN09718.1.g	1.01e-08	1.48391	up	H
novel_miR_123	13231.7	16964	up	FN16681.1.g	6.14e-07	1.21643	up	H
novel_miR_123	13231.7	16964	up	FN09321.1.g	3.64e-05	-1.0434	down	H
novel_miR_123	13231.7	16964	up	FN33518.1.g	0.00140399	-1.73451	down	H
novel_miR_139	179.616	455.926	down	FN10388.1.g	1.78e-12	1.33656	up	H
novel_miR_179	645.286	526.068	up	FN16417.1.g	0.00351985	-1.23397	down	H
novel_miR_179	645.286	526.068	up	FN06165.1.g	3.38e-05	-1.42192	down	H
novel_miR_179	645.286	526.068	up	FN07684.1.g	1.3e-05	1.07662	up	H
novel_miR_179	645.286	526.068	up	FN26080.1.g	0.000980337	-1.30278	down	H
novel_miR_179	645.286	526.068	up	FN15470.1.g	4.18e-75	4.66516	up	H
novel_miR_179	645.286	526.068	up	FN31273.1.g	1.8e-15	5.41612	up	H
novel_miR_179	645.286	526.068	up	FN12774.1.g	2.58e-23	-2.23076	down	H
novel_miR_179	645.286	526.068	up	FN30945.1.g	7.05e-15	1.72296	up	H
novel_miR_179	645.286	526.068	up	FN35835.1.g	2.73e-06	-1.22781	down	H
novel_miR_179	645.286	526.068	up	FN20978.1.g	4.05e-40	3.07944	up	H
novel_miR_179	645.286	526.068	up	FN24951.1.g	5.97e-24	3.15585	up	H
novel_miR_179	645.286	526.068	up	FN28336.1.g	0.000712501	-1.17661	down	H
novel_miR_179	645.286	526.068	up	FN13089.1.g	1.71e-09	-1.40602	down	H
novel_miR_179	645.286	526.068	up	FN36469.1.g	3.19e-14	-1.3554	down	H
novel_miR_179	645.286	526.068	up	FN18360.1.g	8.04e-13	-2.00531	down	H
novel_miR_179	645.286	526.068	up	FN12229.1.g	7.5e-43	3.36504	up	H
novel_miR_179	645.286	526.068	up	FN12159.1.g	1.62e-11	-1.26917	down	H
novel_miR_179	645.286	526.068	up	FN21800.1.g	0.000808421	-1.04818	down	H
novel_miR_179	645.286	526.068	up	FN05655.1.g	1.53e-10	1.75516	up	H
novel_miR_179	645.286	526.068	up	FN01889.1.g	8.2e-11	1.45519	up	H
novel_miR_179	645.286	526.068	up	FN13448.1.g	8.65e-13	1.40726	up	H
novel_miR_179	645.286	526.068	up	FN26562.1.g	1.88e-09	-3.14849	down	H
novel_miR_179	645.286	526.068	up	FN21658.1.g	1.31e-22	-1.43377	down	H
novel_miR_179	645.286	526.068	up	FN15123.1.g	6.1e-07	-1.16875	down	H
novel_miR_179	645.286	526.068	up	FN02095.1.g	0.000738806	-1.09459	down	H
novel_miR_179	645.286	526.068	up	FN16305.1.g	7.71e-09	1.53572	up	H
novel_miR_179	645.286	526.068	up	FN07203.1.g	0.000108992	1.21829	up	H
novel_miR_179	645.286	526.068	up	FN15567.1.g	0.0014687	-1.17594	down	H
novel_miR_179	645.286	526.068	up	FN15509.1.g	1.73e-08	2.34862	up	H
novel_miR_179	645.286	526.068	up	FN01590.1.g	0.000149855	2.27508	up	H
novel_miR_179	645.286	526.068	up	FN09157.1.g	1.5e-13	1.85137	up	H
novel_miR_179	645.286	526.068	up	FN37210.1.g	4.21e-12	-2.74212	down	H
novel_miR_179	645.286	526.068	up	FN00595.1.g	8.84e-08	1.42505	up	H
novel_miR_179	645.286	526.068	up	FN03097.1.g	1.78e-19	1.56614	up	H
novel_miR_179	645.286	526.068	up	FN22419.1.g	2.03e-07	-1.32204	down	H
novel_miR_179	645.286	526.068	up	FN11508.1.g	0.000428113	-1.28491	down	H
novel_miR_179	645.286	526.068	up	FN19269.1.g	9.5e-11	1.47718	up	H
novel_miR_179	645.286	526.068	up	FN13352.1.g	3.41e-16	-1.65897	down	H
novel_miR_179	645.286	526.068	up	FN08448.1.g	1.61e-08	-1.31221	down	H
novel_miR_179	645.286	526.068	up	FN34472.1.g	5.82e-06	-1.87626	down	H
novel_miR_179	645.286	526.068	up	FN04172.1.g	5.61e-14	2.33487	up	H
novel_miR_179	645.286	526.068	up	FN11131.1.g	4.06e-16	1.47714	up	H
novel_miR_179	645.286	526.068	up	FN10734.1.g	6.45e-17	-1.92628	down	H
novel_miR_179	645.286	526.068	up	FN35595.1.g	7.86e-14	2.17522	up	H
novel_miR_179	645.286	526.068	up	FN12030.1.g	1.87e-14	-2.06487	down	H
novel_miR_179	645.286	526.068	up	FN19669.1.g	1.45e-11	-1.13381	down	H
novel_miR_179	645.286	526.068	up	FN11617.1.g	6.59e-08	-1.08663	down	H
novel_miR_179	645.286	526.068	up	FN27614.1.g	1.86e-06	1.10902	up	H
novel_miR_179	645.286	526.068	up	FN16428.1.g	3.36e-07	1.09639	up	H
novel_miR_179	645.286	526.068	up	FN31073.1.g	8.18e-18	1.29341	up	H
novel_miR_179	645.286	526.068	up	FN34240.1.g	3.3e-07	-1.05812	down	H
novel_miR_179	645.286	526.068	up	FN20828.1.g	2.93e-11	1.15199	up	H
novel_miR_179	645.286	526.068	up	FN22704.1.g	8.27e-12	-1.94577	down	H
novel_miR_179	645.286	526.068	up	FN21652.1.g	3e-05	-1.14097	down	H
novel_miR_179	645.286	526.068	up	FN33058.1.g	6.91e-06	-1.7264	down	H
novel_miR_179	645.286	526.068	up	FN23490.1.g	9.32e-09	1.035	up	H
novel_miR_179	645.286	526.068	up	FN21256.1.g	7.69e-16	2.98182	up	H
novel_miR_209	345.926	287.584	down	FN11782.1.g	3.73e-06	1.23185	up	H
novel_miR_75	631.981	522.561	up	FN27614.1.g	1.86e-06	1.10902	up	H
novel_miR_75	631.981	522.561	up	FN11617.1.g	6.59e-08	-1.08663	down	H
novel_miR_75	631.981	522.561	up	FN19669.1.g	1.45e-11	-1.13381	down	H
novel_miR_75	631.981	522.561	up	FN34240.1.g	3.3e-07	-1.05812	down	H
novel_miR_75	631.981	522.561	up	FN31073.1.g	8.18e-18	1.29341	up	H
novel_miR_75	631.981	522.561	up	FN16428.1.g	3.36e-07	1.09639	up	H
novel_miR_75	631.981	522.561	up	FN21652.1.g	3e-05	-1.14097	down	H
novel_miR_75	631.981	522.561	up	FN20828.1.g	2.93e-11	1.15199	up	H
novel_miR_75	631.981	522.561	up	FN22704.1.g	8.27e-12	-1.94577	down	H
novel_miR_75	631.981	522.561	up	FN21256.1.g	7.69e-16	2.98182	up	H
novel_miR_75	631.981	522.561	up	FN33058.1.g	6.91e-06	-1.7264	down	H
novel_miR_75	631.981	522.561	up	FN23490.1.g	9.32e-09	1.035	up	H
novel_miR_75	631.981	522.561	up	FN22419.1.g	2.03e-07	-1.32204	down	H
novel_miR_75	631.981	522.561	up	FN11508.1.g	0.000428113	-1.28491	down	H
novel_miR_75	631.981	522.561	up	FN03097.1.g	1.78e-19	1.56614	up	H
novel_miR_75	631.981	522.561	up	FN04172.1.g	5.61e-14	2.33487	up	H
novel_miR_75	631.981	522.561	up	FN34472.1.g	5.82e-06	-1.87626	down	H
novel_miR_75	631.981	522.561	up	FN08448.1.g	1.61e-08	-1.31221	down	H
novel_miR_75	631.981	522.561	up	FN13352.1.g	3.41e-16	-1.65897	down	H
novel_miR_75	631.981	522.561	up	FN19269.1.g	9.5e-11	1.47718	up	H
novel_miR_75	631.981	522.561	up	FN11131.1.g	4.06e-16	1.47714	up	H
novel_miR_75	631.981	522.561	up	FN35595.1.g	7.86e-14	2.17522	up	H
novel_miR_75	631.981	522.561	up	FN12030.1.g	1.87e-14	-2.06487	down	H
novel_miR_75	631.981	522.561	up	FN10734.1.g	6.45e-17	-1.92628	down	H
novel_miR_75	631.981	522.561	up	FN13448.1.g	8.65e-13	1.40726	up	H
novel_miR_75	631.981	522.561	up	FN21658.1.g	1.31e-22	-1.43377	down	H
novel_miR_75	631.981	522.561	up	FN26562.1.g	1.88e-09	-3.14849	down	H
novel_miR_75	631.981	522.561	up	FN01889.1.g	8.2e-11	1.45519	up	H
novel_miR_75	631.981	522.561	up	FN05655.1.g	1.53e-10	1.75516	up	H
novel_miR_75	631.981	522.561	up	FN21800.1.g	0.000808421	-1.04818	down	H
novel_miR_75	631.981	522.561	up	FN16305.1.g	7.71e-09	1.53572	up	H
novel_miR_75	631.981	522.561	up	FN07203.1.g	0.000108992	1.21829	up	H
novel_miR_75	631.981	522.561	up	FN15123.1.g	6.1e-07	-1.16875	down	H
novel_miR_75	631.981	522.561	up	FN02095.1.g	0.000738806	-1.09459	down	H
novel_miR_75	631.981	522.561	up	FN01590.1.g	0.000149855	2.27508	up	H
novel_miR_75	631.981	522.561	up	FN15509.1.g	1.73e-08	2.34862	up	H
novel_miR_75	631.981	522.561	up	FN09157.1.g	1.5e-13	1.85137	up	H
novel_miR_75	631.981	522.561	up	FN15567.1.g	0.0014687	-1.17594	down	H
novel_miR_75	631.981	522.561	up	FN00595.1.g	8.84e-08	1.42505	up	H
novel_miR_75	631.981	522.561	up	FN37210.1.g	4.21e-12	-2.74212	down	H
novel_miR_75	631.981	522.561	up	FN31273.1.g	1.8e-15	5.41612	up	H
novel_miR_75	631.981	522.561	up	FN07684.1.g	1.3e-05	1.07662	up	H
novel_miR_75	631.981	522.561	up	FN06165.1.g	3.38e-05	-1.42192	down	H
novel_miR_75	631.981	522.561	up	FN15470.1.g	4.18e-75	4.66516	up	H
novel_miR_75	631.981	522.561	up	FN26080.1.g	0.000980337	-1.30278	down	H
novel_miR_75	631.981	522.561	up	FN16417.1.g	0.00351985	-1.23397	down	H
novel_miR_75	631.981	522.561	up	FN35835.1.g	2.73e-06	-1.22781	down	H
novel_miR_75	631.981	522.561	up	FN30945.1.g	7.05e-15	1.72296	up	H
novel_miR_75	631.981	522.561	up	FN24951.1.g	5.97e-24	3.15585	up	H
novel_miR_75	631.981	522.561	up	FN20978.1.g	4.05e-40	3.07944	up	H
novel_miR_75	631.981	522.561	up	FN12774.1.g	2.58e-23	-2.23076	down	H
novel_miR_75	631.981	522.561	up	FN13089.1.g	1.71e-09	-1.40602	down	H
novel_miR_75	631.981	522.561	up	FN28336.1.g	0.000712501	-1.17661	down	H
novel_miR_75	631.981	522.561	up	FN12159.1.g	1.62e-11	-1.26917	down	H
novel_miR_75	631.981	522.561	up	FN12229.1.g	7.5e-43	3.36504	up	H
novel_miR_75	631.981	522.561	up	FN18360.1.g	8.04e-13	-2.00531	down	H
novel_miR_75	631.981	522.561	up	FN36469.1.g	3.19e-14	-1.3554	down	H
novel_miR_199	737.85	277.262	up	FN13475.1.g	3.94e-08	2.08953	up	J
novel_miR_199	737.85	277.262	up	FN25080.1.g	4.6e-06	1.51155	up	J
novel_miR_199	737.85	277.262	up	FN31367.1.g	1.08e-173	6.8536	up	J
novel_miR_200	2771.04	2708.64	up	FN19635.1.g	3.24e-07	-1.43644	down	J
novel_miR_200	2771.04	2708.64	up	FN32117.1.g	4.24e-05	1.0002	up	J
novel_miR_200	2771.04	2708.64	up	FN27427.1.g	4.78e-10	1.02722	up	J
novel_miR_200	2771.04	2708.64	up	FN33710.1.g	9.49e-10	6.26047	up	J
novel_miR_200	2771.04	2708.64	up	FN08120.1.g	4.59e-06	1.03191	up	J
novel_miR_200	2771.04	2708.64	up	FN33926.1.g	0.000116231	-2.0461	down	J
novel_miR_207	159.868	206.169	up	FN21610.1.g	1.1e-13	-1.33749	down	J
novel_miR_207	159.868	206.169	up	FN15970.1.g	1.22e-10	1.16773	up	J
novel_miR_207	159.868	206.169	up	FN06925.1.g	0.00174722	-1.81475	down	J
novel_miR_207	159.868	206.169	up	FN28956.1.g	4.14e-06	1.89704	up	J
novel_miR_207	159.868	206.169	up	FN17610.1.g	2.5e-17	-1.57184	down	J
novel_miR_207	159.868	206.169	up	FN00424.1.g	3.92e-22	1.83027	up	J
novel_miR_207	159.868	206.169	up	FN06571.1.g	2.64e-93	3.69638	up	J
novel_miR_207	159.868	206.169	up	FN15903.1.g	1.67e-08	-1.19384	down	J
novel_miR_207	159.868	206.169	up	FN01405.1.g	5.42e-11	-1.32088	down	J
novel_miR_207	159.868	206.169	up	FN02754.1.g	4.97e-18	3.94444	up	J
novel_miR_207	159.868	206.169	up	FN22553.1.g	1.74e-15	1.58593	up	J
novel_miR_207	159.868	206.169	up	FN10590.1.g	1.44e-18	1.37327	up	J
novel_miR_207	159.868	206.169	up	FN32165.1.g	2.11e-06	-2.75602	down	J
novel_miR_207	159.868	206.169	up	FN35084.1.g	9.51e-13	1.28138	up	J
novel_miR_207	159.868	206.169	up	FN35039.1.g	1.13e-19	2.86001	up	J
novel_miR_207	159.868	206.169	up	FN11163.1.g	5.53e-05	-1.08855	down	J
novel_miR_207	159.868	206.169	up	FN29310.1.g	1.8e-15	-1.84265	down	J
novel_miR_207	159.868	206.169	up	FN36820.1.g	1.08e-06	1.20591	up	J
novel_miR_207	159.868	206.169	up	FN29350.1.g	2.02e-15	1.58348	up	J
novel_miR_207	159.868	206.169	up	FN35024.1.g	2.37e-116	5.40534	up	J
novel_miR_207	159.868	206.169	up	FN08306.1.g	4.98e-19	-2.96266	down	J
novel_miR_207	159.868	206.169	up	FN03510.1.g	6.44e-13	1.11989	up	J
novel_miR_207	159.868	206.169	up	FN12403.1.g	1.08e-21	1.79733	up	J
novel_miR_207	159.868	206.169	up	FN06157.1.g	1.09e-08	-1.43937	down	J
novel_miR_207	159.868	206.169	up	FN16441.1.g	3.68e-12	1.30308	up	J
novel_miR_207	159.868	206.169	up	FN04883.1.g	1.07e-83	4.77768	up	J
novel_miR_207	159.868	206.169	up	FN24077.1.g	1.95e-07	1.96482	up	J
novel_miR_207	159.868	206.169	up	FN03998.1.g	1.45e-16	1.39126	up	J
novel_miR_207	159.868	206.169	up	FN09321.1.g	1.16e-06	-1.41126	down	J
novel_miR_207	159.868	206.169	up	FN08261.1.g	1.59e-11	-1.9188	down	J
novel_miR_207	159.868	206.169	up	FN15078.1.g	1.66e-15	1.6933	up	J
novel_miR_207	159.868	206.169	up	FN04287.1.g	0.000445793	1.46446	up	J
novel_miR_207	159.868	206.169	up	FN29842.1.g	5.86e-08	-1.63471	down	J
novel_miR_207	159.868	206.169	up	FN30456.1.g	0.00192391	-1.652	down	J
novel_miR_207	159.868	206.169	up	FN00862.1.g	6.29e-06	-2.0287	down	J
novel_miR_207	159.868	206.169	up	FN31337.1.g	3.38e-29	4.64932	up	J
novel_miR_207	159.868	206.169	up	FN16209.1.g	2.04e-05	-1.5129	down	J
novel_miR_207	159.868	206.169	up	FN28164.1.g	0.0040256	1.01815	up	J
novel_miR_207	159.868	206.169	up	FN04633.1.g	1.19e-05	-1.64863	down	J
novel_miR_207	159.868	206.169	up	FN01592.1.g	7.92e-93	5.38362	up	J
novel_miR_207	159.868	206.169	up	FN04122.1.g	1.93e-13	1.72957	up	J
novel_miR_207	159.868	206.169	up	FN16264.1.g	0.000336483	-2.71044	down	J
novel_miR_207	159.868	206.169	up	FN24265.1.g	0.00265689	-1.99721	down	J
novel_miR_207	159.868	206.169	up	FN28064.1.g	1.37e-19	2.11063	up	J
novel_miR_207	159.868	206.169	up	FN37059.1.g	2.81e-19	3.10091	up	J
novel_miR_207	159.868	206.169	up	FN14391.1.g	0.00017356	-1.30607	down	J
novel_miR_229	143.471	135.077	down	FN06108.1.g	1.26e-25	3.86889	up	J
novel_miR_229	143.471	135.077	down	FN21447.1.g	2.68e-12	1.88079	up	J
novel_miR_234	49.19	21.3279	down	FN00843.1.g	5.11e-40	2.68242	up	J
novel_miR_234	49.19	21.3279	down	FN17969.1.g	2.29e-37	3.13793	up	J
novel_miR_253	225.454	56.8743	up	FN31143.1.g	1.7e-30	4.60634	up	J
novel_miR_253	225.454	56.8743	up	FN12982.1.g	1.84e-07	-1.30951	down	J
novel_miR_282	418.115	355.465	up	FN17016.1.g	1.14e-08	-1.14379	down	J
novel_miR_282	418.115	355.465	up	FN30740.1.g	2.54e-11	1.61058	up	J
novel_miR_282	418.115	355.465	up	FN26221.1.g	2.92e-22	2.9336	up	J
novel_miR_55	368.925	305.7	up	FN21950.1.g	0.00253616	-2.01541	down	J
novel_miR_55	368.925	305.7	up	FN27818.1.g	1.27e-08	-1.81434	down	J
novel_miR_55	368.925	305.7	up	FN09739.1.g	1.33e-236	5.72894	up	J
novel_miR_55	368.925	305.7	up	FN11136.1.g	3.51e-16	-2.37991	down	J
novel_miR_55	368.925	305.7	up	FN25651.1.g	1.99e-07	1.08986	up	J
novel_miR_55	368.925	305.7	up	FN10328.1.g	4.92e-09	-1.11934	down	J
novel_miR_55	368.925	305.7	up	FN32186.1.g	5.6e-17	1.60515	up	J
novel_miR_55	368.925	305.7	up	FN14171.1.g	4.22e-10	-1.22681	down	J
novel_miR_55	368.925	305.7	up	FN12862.1.g	6.01e-05	1.79722	up	J
novel_miR_55	368.925	305.7	up	FN01479.1.g	2.14e-25	2.79498	up	J
novel_miR_55	368.925	305.7	up	FN23806.1.g	2.94e-21	3.60699	up	J
novel_miR_55	368.925	305.7	up	FN35103.1.g	6.55e-90	5.95197	up	J
novel_miR_55	368.925	305.7	up	FN08211.1.g	3.25e-18	2.2778	up	J
novel_miR_55	368.925	305.7	up	FN10405.1.g	3.71e-09	-1.02148	down	J
novel_miR_55	368.925	305.7	up	FN11699.1.g	8.9e-06	-1.22954	down	J
novel_miR_59	65.5867	49.765	up	FN33402.1.g	2.58e-05	1.09321	up	J
novel_miR_59	65.5867	49.765	up	FN18737.1.g	9.51e-22	-1.99957	down	J
novel_miR_59	65.5867	49.765	up	FN21082.1.g	0.000336761	-2.23776	down	J
novel_miR_59	65.5867	49.765	up	FN34241.1.g	4.94e-42	3.30678	up	J
novel_miR_65	323.834	163.514	up	FN00819.1.g	3.92e-16	-3.0912	down	J
novel_miR_65	323.834	163.514	up	FN13420.1.g	5.8e-08	1.42423	up	J
novel_miR_65	323.834	163.514	up	FN36730.1.g	2.75e-14	4.96282	up	J
novel_miR_94	65.5867	28.4372	up	FN18067.1.g	5.77e-09	1.48796	up	J
novel_miR_94	65.5867	28.4372	up	FN17800.1.g	6.87e-13	1.42337	up	J
novel_miR_94	65.5867	28.4372	up	FN08165.1.g	8.82e-07	-1.21064	down	J
